# Supplementary material
Source: PubMed Central journal article supplement (PMC5374727)
Supplement: NIHMS811773-supplement-Supp_Fig_S1.pdf [file NIHMS811773-supplement-Supp_Fig_S1.pdf]

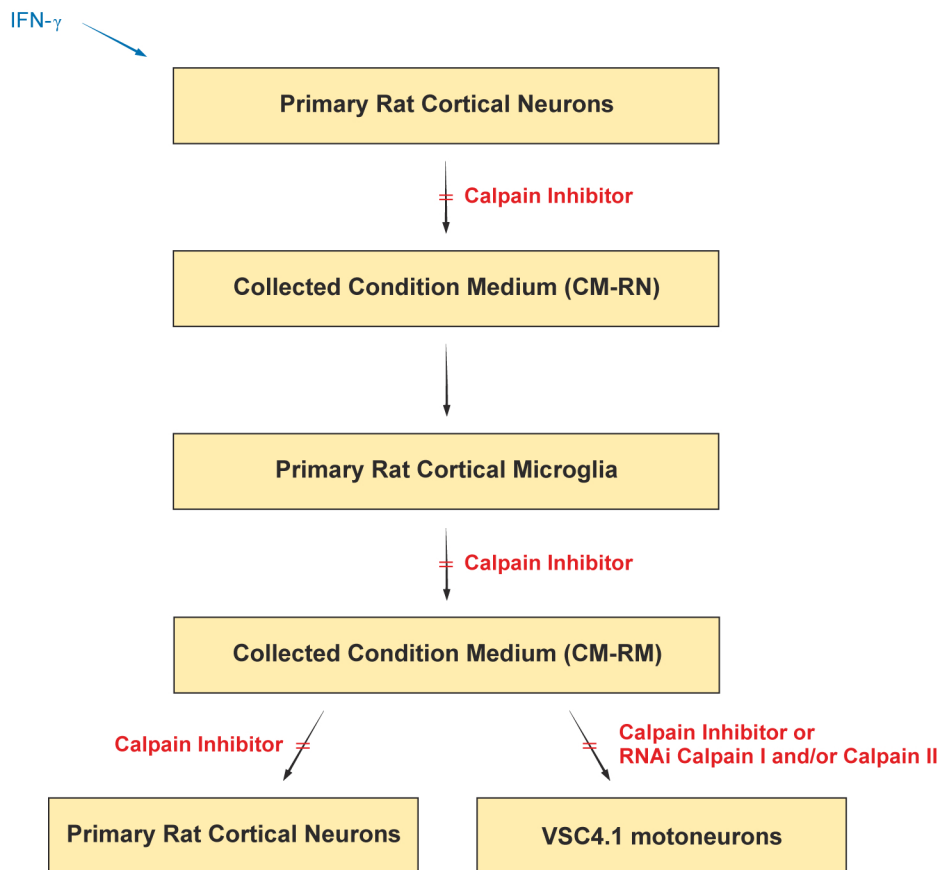

**Supplemental Figure 1.** Flow chart outline of treatment of rat primary cells and VSC4.1 motoneurons culture experiments.
