# Supplementary material
Source: PubMed Central journal article supplement (PMC5374727)
Supplement: NIHMS811773-supplement-Supp_Fig_S2.pdf [file NIHMS811773-supplement-Supp_Fig_S2.pdf]

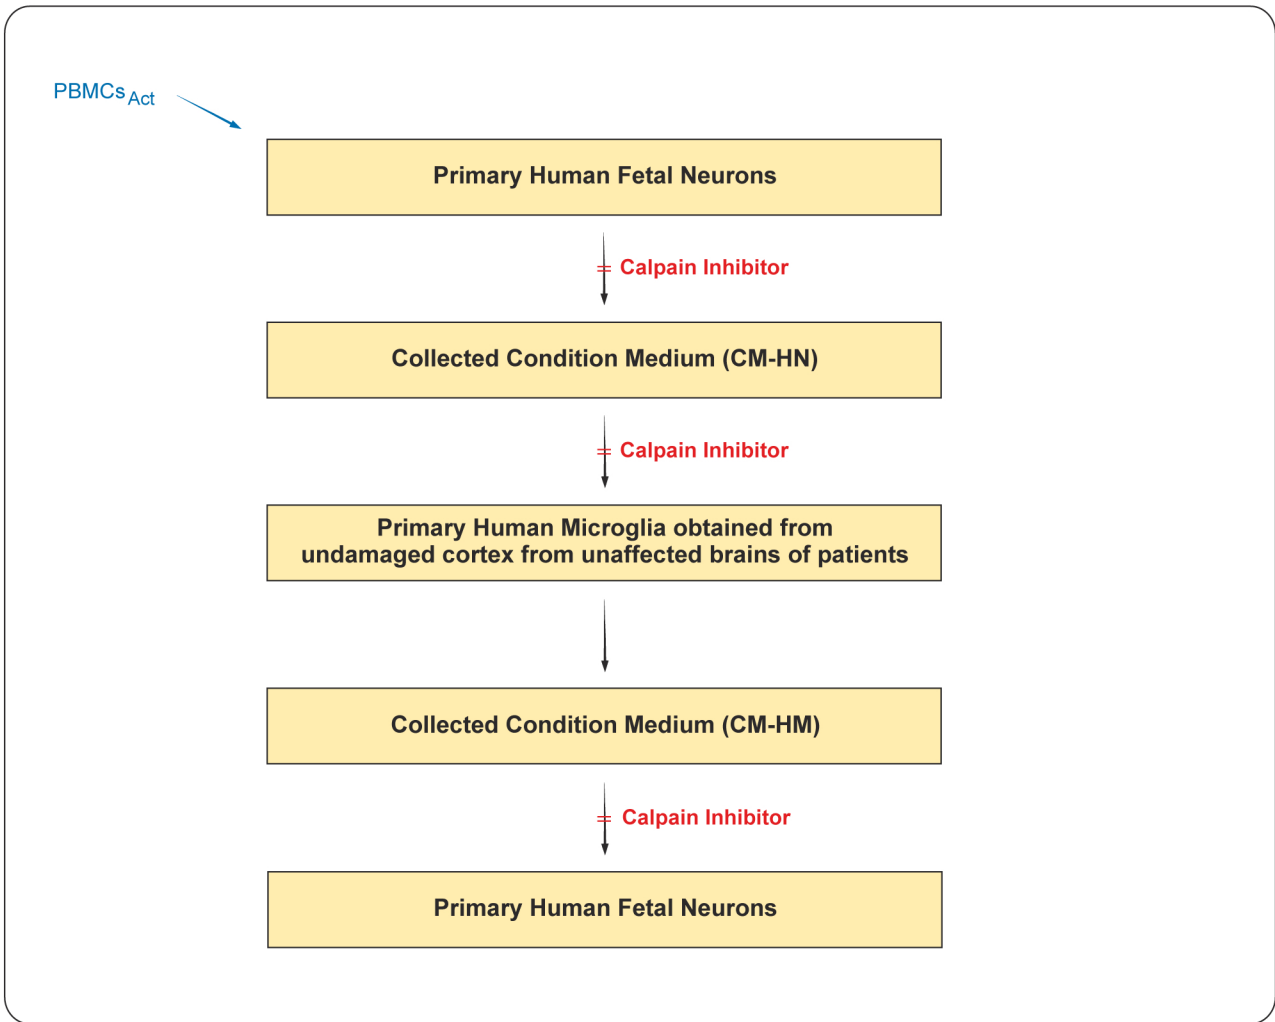

**Supplemental Figure 2.** Flow chart of treatment of PBMCs from MS patients stimulated with 10  $\mu\text{g/ml}$  of anti-CD3 and 5  $\mu\text{g/ml}$  of anti-CD28 antibody.
